# Supplementary material for: Effect of core/shell structured TiO2@C nanowire support on the Pt catalytic performance for methanol electrooxidation
Source: Royal Society of Chemistry journal article supplement (doi:10.1039/c5cy02188j), 2016-01-01
Supplement: c5cy02188j1.pdf [file c5cy02188j1.pdf]

## Supporting Information

### Effect of Core/shell Structured TiO<sub>2</sub>@C Nanowires Support on the Pt Catalytic Performance for Methanol Electrooxidation

Xu-Lei Sui <sup>1,2</sup>, Zhen-Bo Wang <sup>1,\*</sup>, Cun-Zhi Li<sup>1,2</sup>, Jing-Jia Zhang <sup>1</sup>, Lei Zhao <sup>1</sup>, Da-  
Ming Gu <sup>2</sup>

<sup>1</sup> School of Chemical Engineering and Technology, Harbin Institute of Technology,  
No.92 West-Da Zhi Street, Harbin, 150001 China. E-mail: wangzjb@hit.edu.cn;  
Tel.: +86-451-86417853; Fax: +86-451-86418616

<sup>2</sup> School of Science, Harbin Institute of Technology, No.92 West-Da Zhi  
Street, Harbin, 150001 China

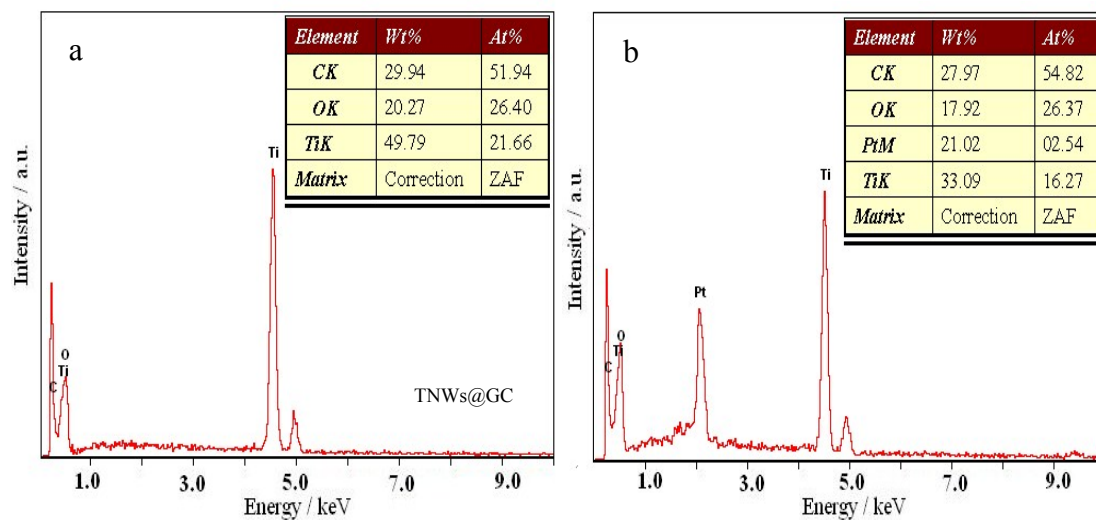

**Figure S1.** EDS of TNWs@GC (a) and Pt/TNWs@GC (b) catalysts

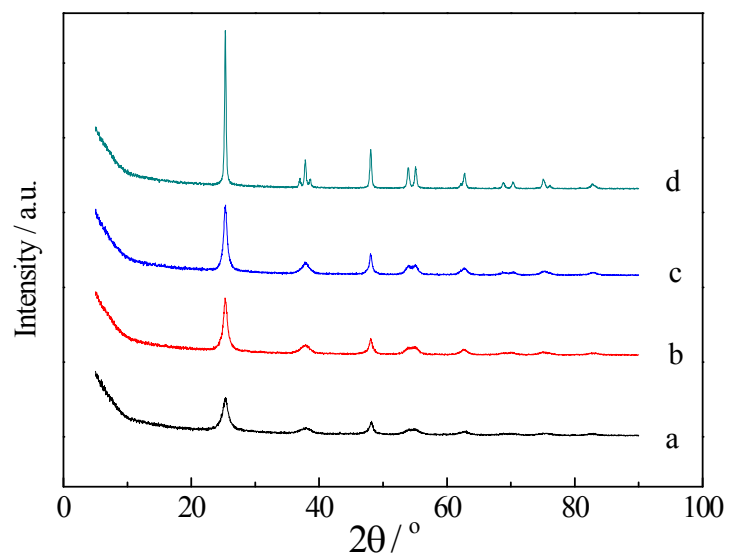

**Figure S2.** XRD patterns of TNWs@GC at different temperature (a: 600 °C, b: 700 °C, c: 800 °C, d: 900 °C)

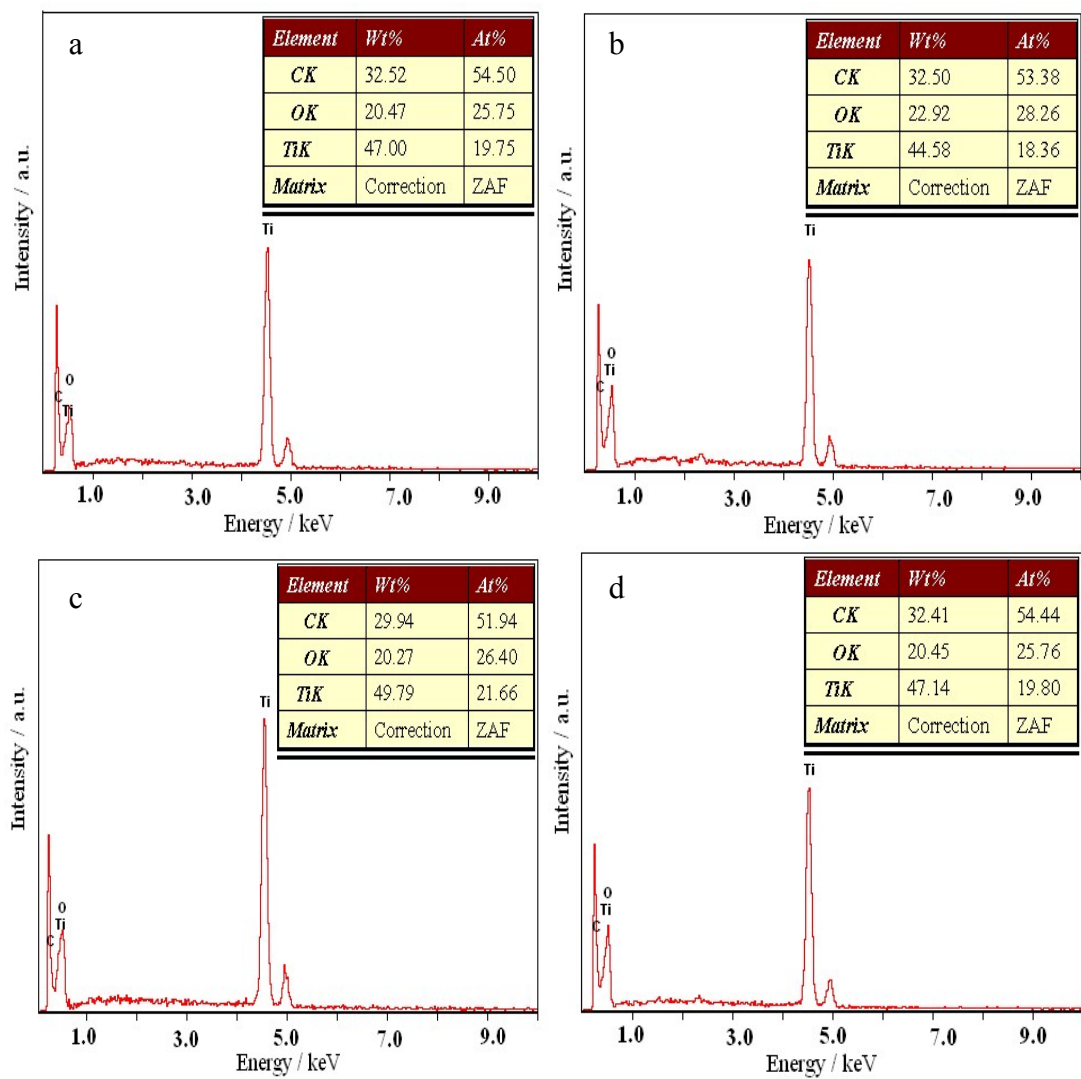

**Figure S3.** EDS of TNWs@GC at different temperature (a: 600 °C, b: 700 °C, c: 800 °C, d: 900 °C)

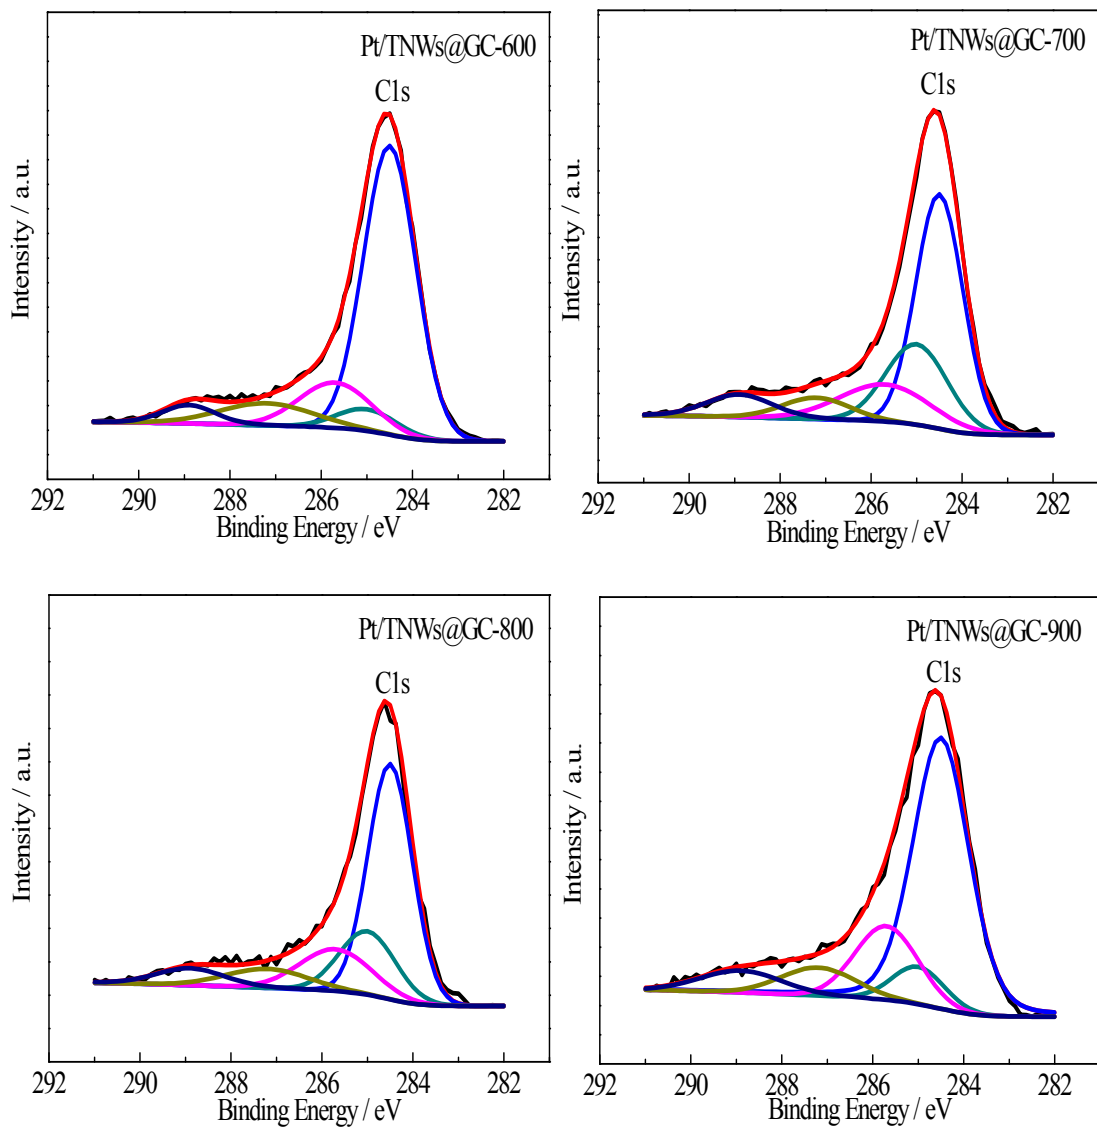

**Figure S4.** XPS curves of C1s peak for the different Pt/TNWs@GC

**Table S1.** Deconvoluted results of C 1s peak for the different Pt/TNWs@GC

| Pt/TNWs@GC | sp <sup>2</sup> -C<br>284.5 eV | C<br>285.0 eV | -C-OR<br>285.7 eV | >C=O<br>287.2 eV | -COOR<br>288.9 eV |
|------------|--------------------------------|---------------|-------------------|------------------|-------------------|
| 600 °C     | 66.3 %                         | 5.7 %         | 14.3 %            | 9.1 %            | 4.6 %             |
| 700 °C     | 49.4 %                         | 22.2 %        | 14.9 %            | 6.4 %            | 7.1 %             |
| 800 °C     | 52.8 %                         | 18.0 %        | 15.1 %            | 7.9 %            | 6.2 %             |
| 900 °C     | 61.4 %                         | 7.2 %         | 17.1 %            | 7.7 %            | 6.6 %             |

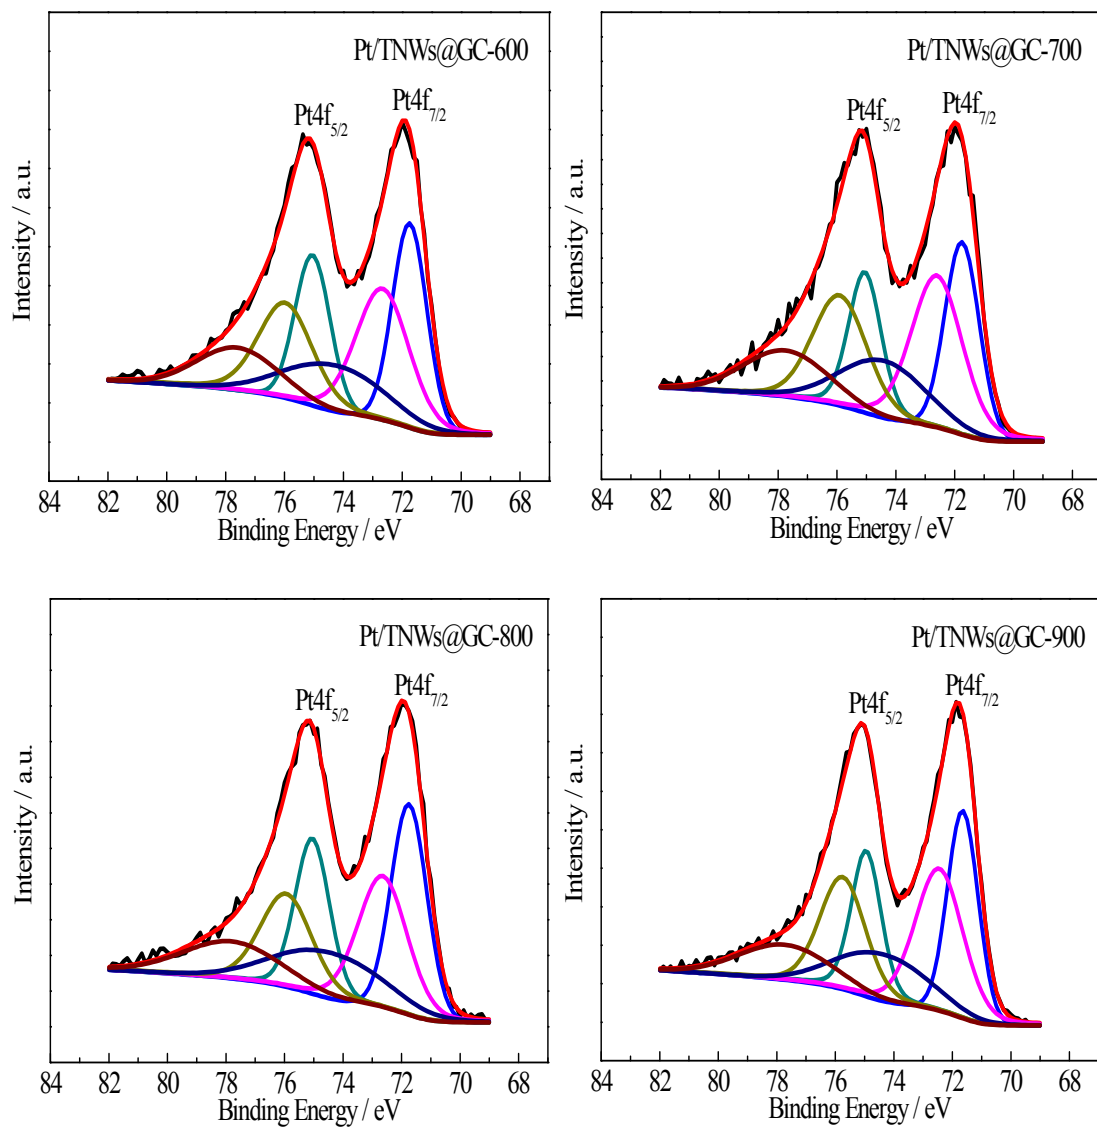

**Figure S5.** XPS curves of Pt4f peak for the different Pt/TNWs@GC

**Table S2.** Deconvoluted results of Pt4f peak for the different Pt/TNWs@GC

| Pt/TNWs@GC | Pt species | Binding energy | Relative content |
|------------|------------|----------------|------------------|
| 600 °C     | Pt (0)     | 71.8 eV        | 36.9 %           |
|            | Pt (II)    | 72.7 eV        | 39.3 %           |
|            | Pt (IV)    | 74.3 eV        | 23.8 %           |
| 700 °C     | Pt (0)     | 71.8 eV        | 32.6 %           |
|            | Pt (II)    | 72.6 eV        | 41.9 %           |
|            | Pt (IV)    | 74.4 eV        | 25.5 %           |
| 800 °C     | Pt (0)     | 71.8 eV        | 38.4 %           |
|            | Pt (II)    | 72.6 eV        | 35.8 %           |
|            | Pt (IV)    | 74.5 eV        | 25.8 %           |
| 900 °C     | Pt (0)     | 71.7 eV        | 35.4 %           |
|            | Pt (II)    | 72.6 eV        | 40.8 %           |
|            | Pt (IV)    | 74.4 eV        | 23.8 %           |

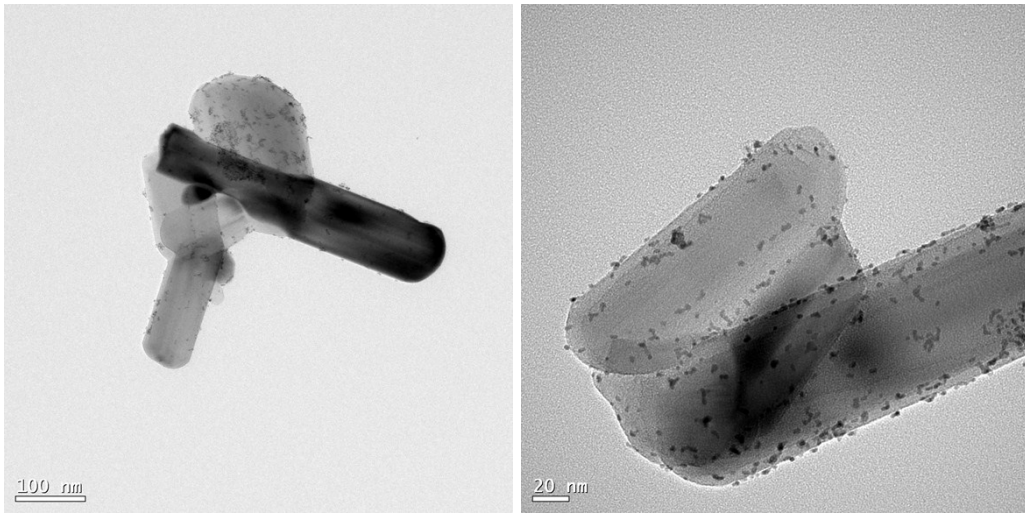

**Figure S6.** TEM images of non-carbon-coated NaTNTs after annealing at 800 °C



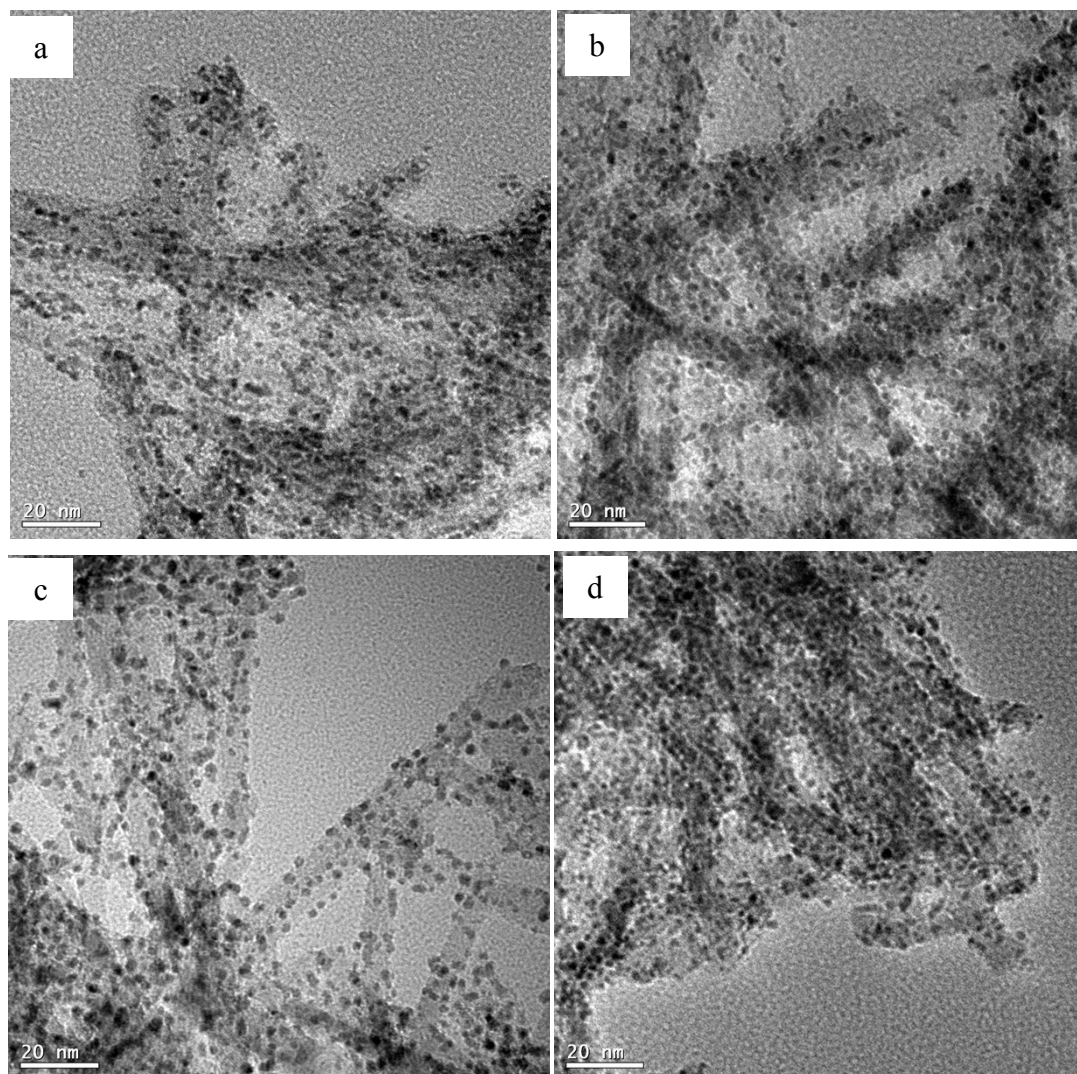

**Figure S7.** TEM images of Pt/TNWs@GC at different temperature (a: 600 °C, b: 700 °C, c: 800 °C, d: 900 °C)

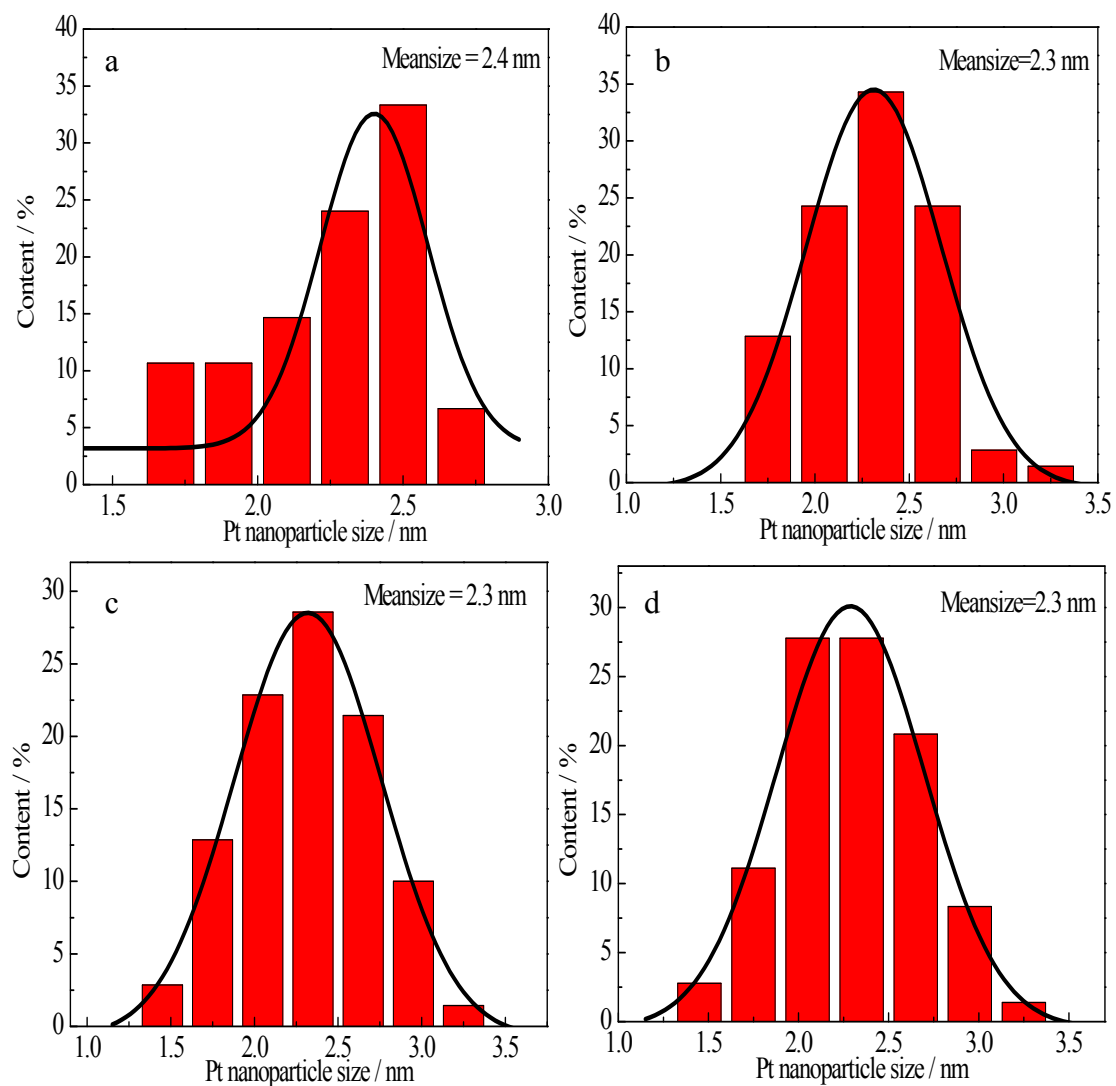

**Figure S8.** The size distributions of Pt nanoparticles on Pt/TNWs@GC (a: 600 °C, b: 700 °C, c: 800 °C, d: 900 °C)

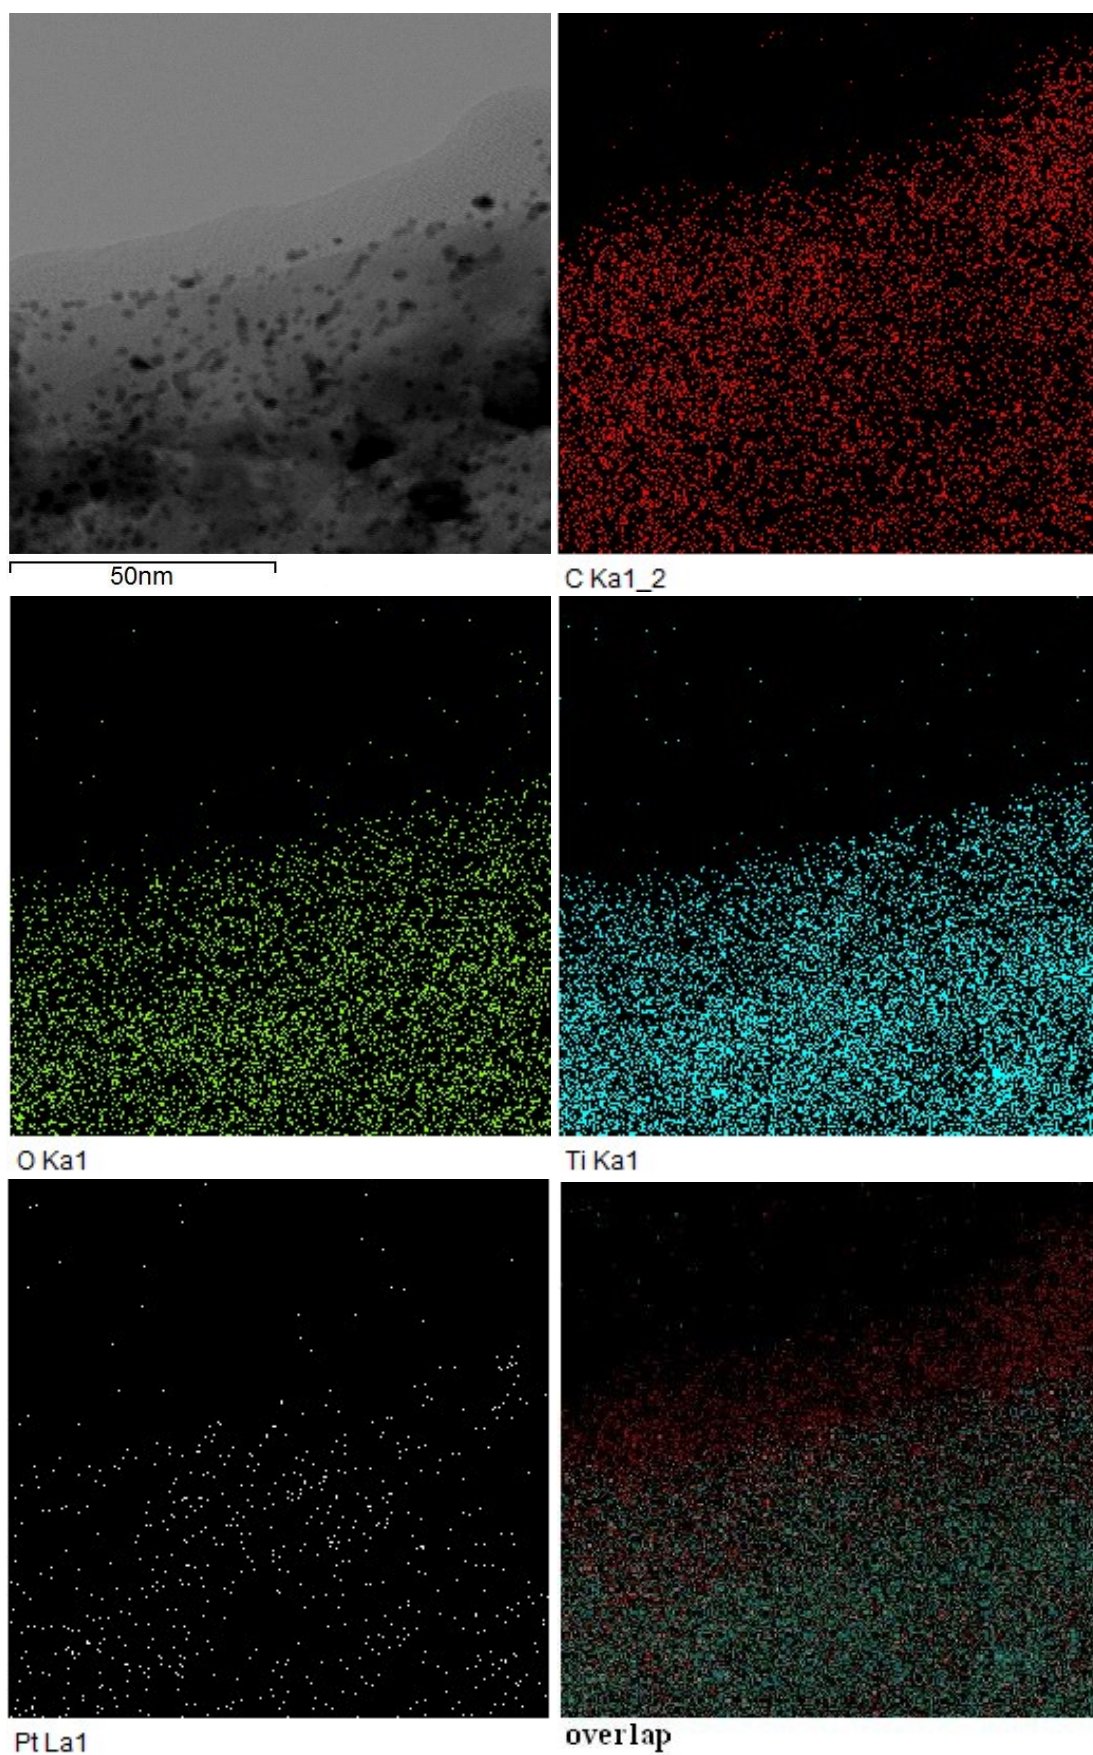

**Figure S9.** High-magnification elemental mapping of as-prepared Pt/TNWs@GC-800

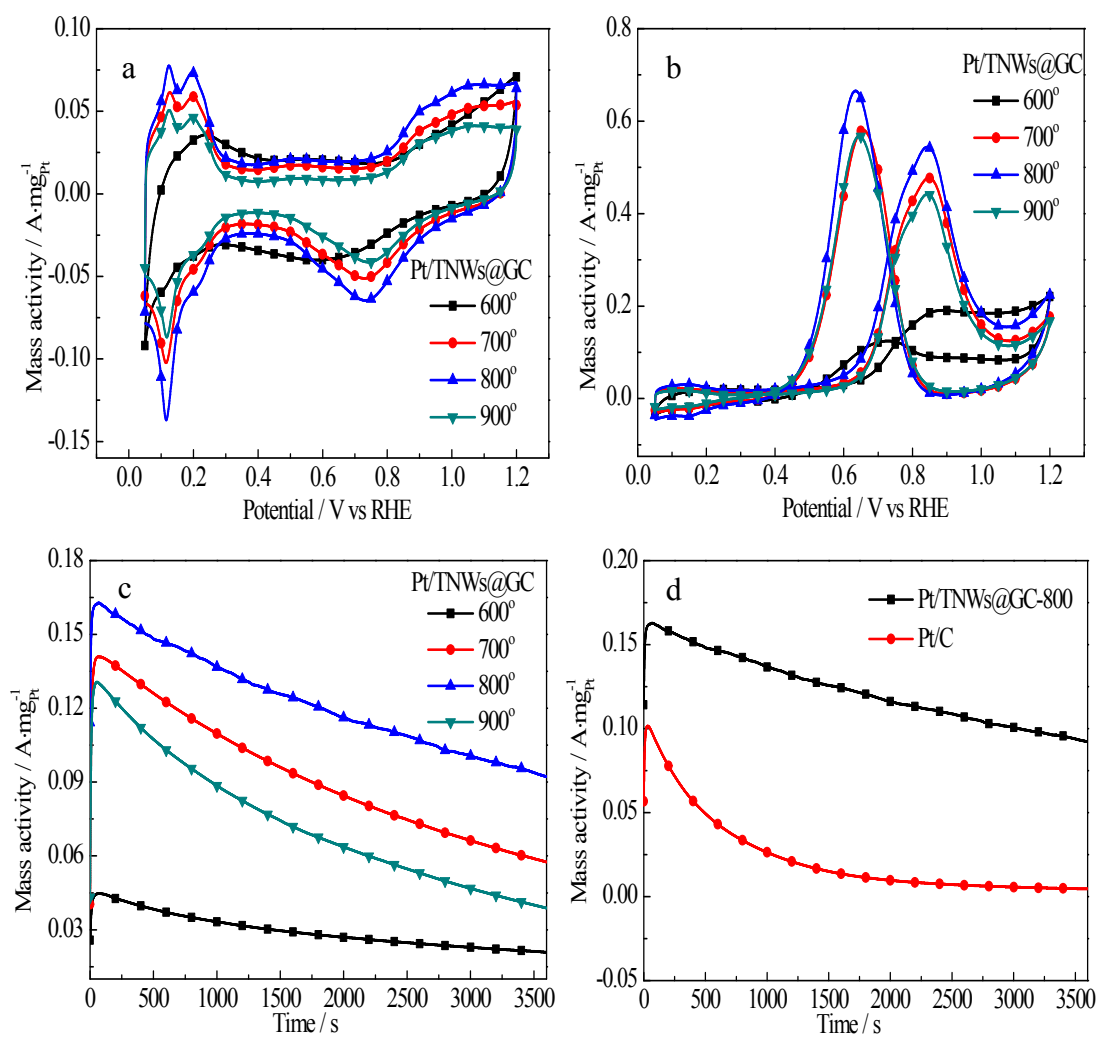

**Figure S10.** Cyclic voltammogram in 0.5 mol·L<sup>-1</sup> H<sub>2</sub>SO<sub>4</sub> (a) and in methanol acidic medium (b) of the different Pt/TNWs@GC; amperometric *i-t* curves in methanol acidic medium for different catalysts (c, d)

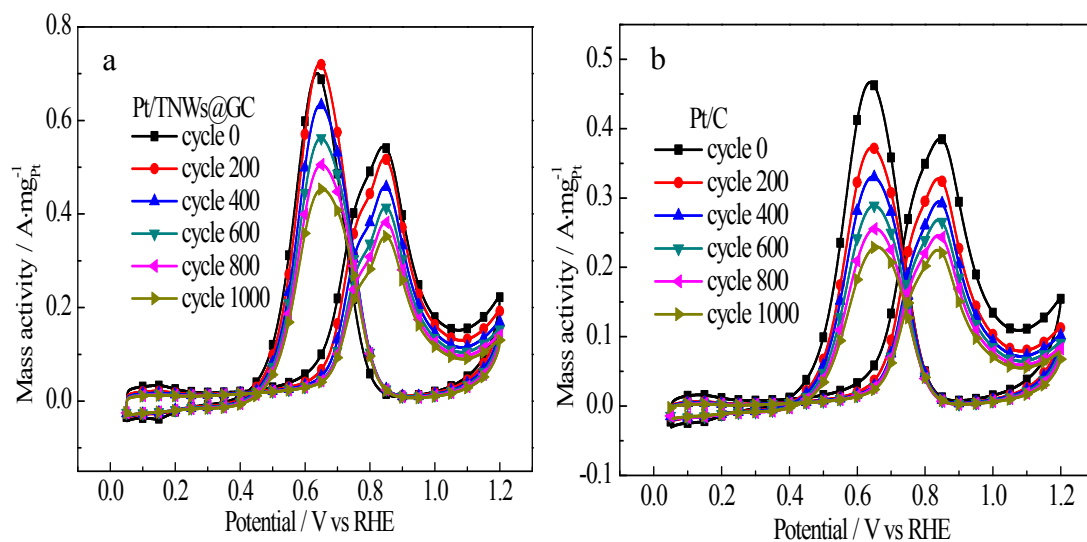

**Figure S11.** Cycling aging test of Pt/TNWs@GC-800 (a) and Pt/C (b) catalysts

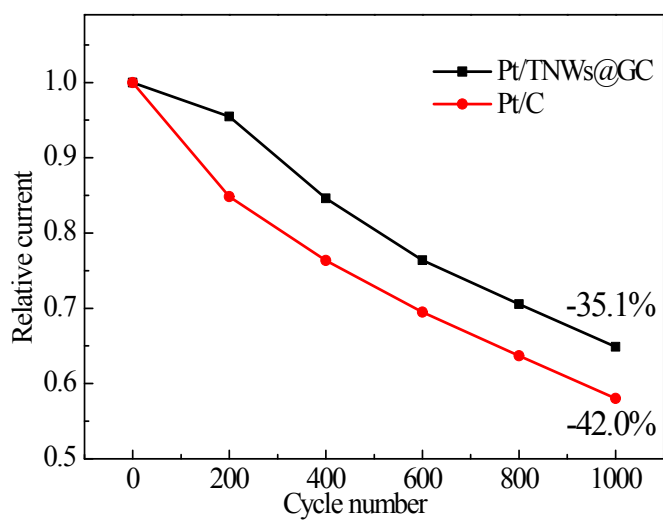

**Figure S12.** The normalized peak current density with cycle numbers
